# Supplementary material for: Antiplasmodial Activity of p-Substituted Benzyl Thiazinoquinone Derivatives and Their Potential against Parasitic Infections
Source: PubMed Central journal article supplement (PMC7180939; doi:10.3390/molecules25071530), 2020-03-27
Supplement: molecules-25-01530-s001.pdf [file molecules-25-01530-s001.pdf]

# Antiplasmodial activity of *p*-substituted benzyl thiazinoquinone derivatives and their potential against multiparasitic infections

Marcello Casertano<sup>1,2</sup>, Marialuisa Menna<sup>1,2</sup>, Caterina Fattorusso<sup>1,2</sup>, Nicoletta Basilico<sup>3</sup>, Silvia Parapini<sup>4</sup>, Marco Persico<sup>1,2</sup>, and Concetta Imperatore<sup>1,2,\*</sup>

<sup>1</sup> Department of Pharmacy, University of Naples "Federico II", Via D. Montesano 49, 80131 Napoli, Italy; [marcello.casertano@unina.it](mailto:marcello.casertano@unina.it) (M.C.); [mlmenna@unina.it](mailto:mlmenna@unina.it) (M.M.); [caterina.fattorusso@unina.it](mailto:caterina.fattorusso@unina.it) (C.F.); [marco.persico@unina.it](mailto:marco.persico@unina.it) (M.P.);

<sup>2</sup> Italian Malaria Network, Centro Interuniversitario di Ricerche Sulla Malaria (CIRM), Department of Pharmacy, University of Naples "Federico II", Via D. Montesano 49, 80131 Napoli, Italy;

<sup>3</sup> Dipartimento di Scienze Biomediche, Chirurgiche e Odontoiatriche, Università di Milano, Via Pascal 36, 20133 Milan, Italy; [nicoletta.basilico@unimi.it](mailto:nicoletta.basilico@unimi.it) (N.B.);

<sup>4</sup> Dipartimento di Scienze Biomediche per la Salute, Università di Milano, Via Pascal 36, 20133 Milan, Italy; [silvia.parapini@unimi.it](mailto:silvia.parapini@unimi.it) (S.P.);

\* Correspondence: [cimperat@unina.it](mailto:cimperat@unina.it) (C.I.); Tel.: +39081678530.

## TABLE OF CONTENTS

|                                                                                                |   |
|------------------------------------------------------------------------------------------------|---|
| <b>Figure S1.</b> HRESIMS spectrum of compound <b>24</b> .....                                 | 3 |
| <b>Figure S2.</b> <sup>1</sup> H NMR spectrum of compound <b>24</b> in CDCl <sub>3</sub> ..... | 3 |
| <b>Figure S3.</b> HRESIMS spectrum of compound <b>25</b> .....                                 | 4 |
| <b>Figure S4.</b> <sup>1</sup> H NMR spectrum of compound <b>25</b> in CDCl <sub>3</sub> ..... | 4 |
| <b>Figure S5.</b> HRESIMS spectrum of compound <b>26</b> .....                                 | 5 |
| <b>Figure S6.</b> <sup>1</sup> H NMR spectrum of compound <b>26</b> in CDCl <sub>3</sub> ..... | 5 |
| <b>Figure S7.</b> HRESIMS spectrum of compound <b>27</b> .....                                 | 6 |
| <b>Figure S8.</b> <sup>1</sup> H NMR spectrum of compound <b>27</b> in CDCl <sub>3</sub> ..... | 6 |
| <b>Table S1.</b> cLogD values of compounds <b>22</b> and <b>24-27</b> .....                    | 7 |

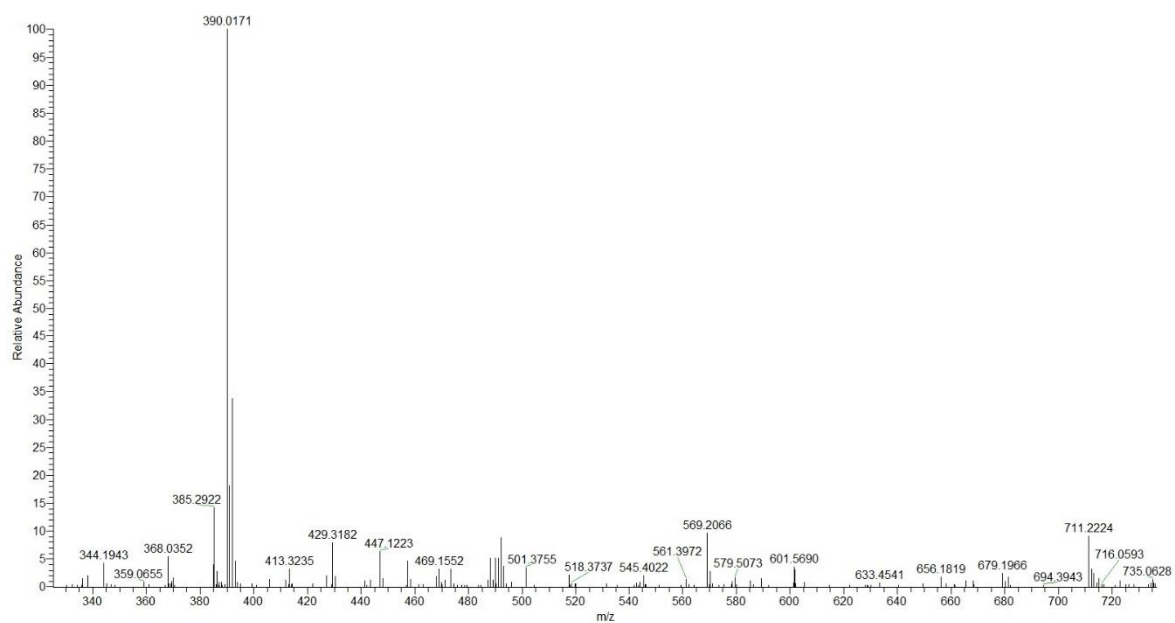

**Figure S1.** HRESIMS spectrum of compound **24**

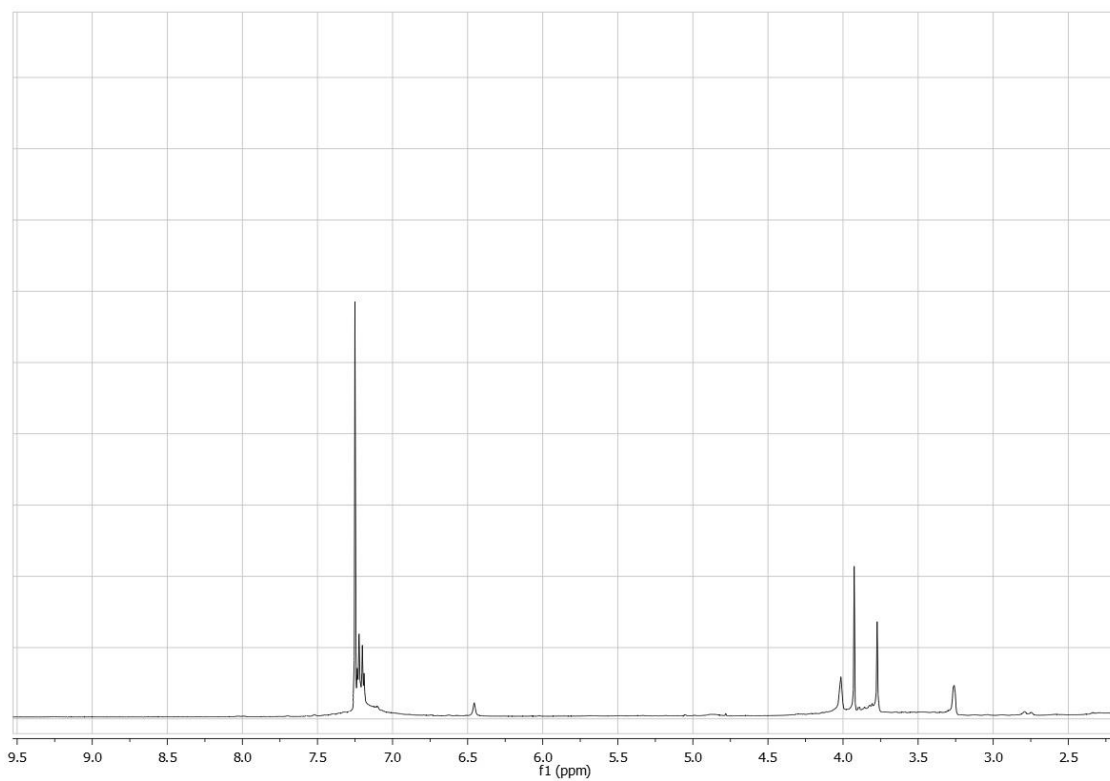

**Figure S2.** <sup>1</sup>H NMR spectrum of compound **24** in CDCl<sub>3</sub>

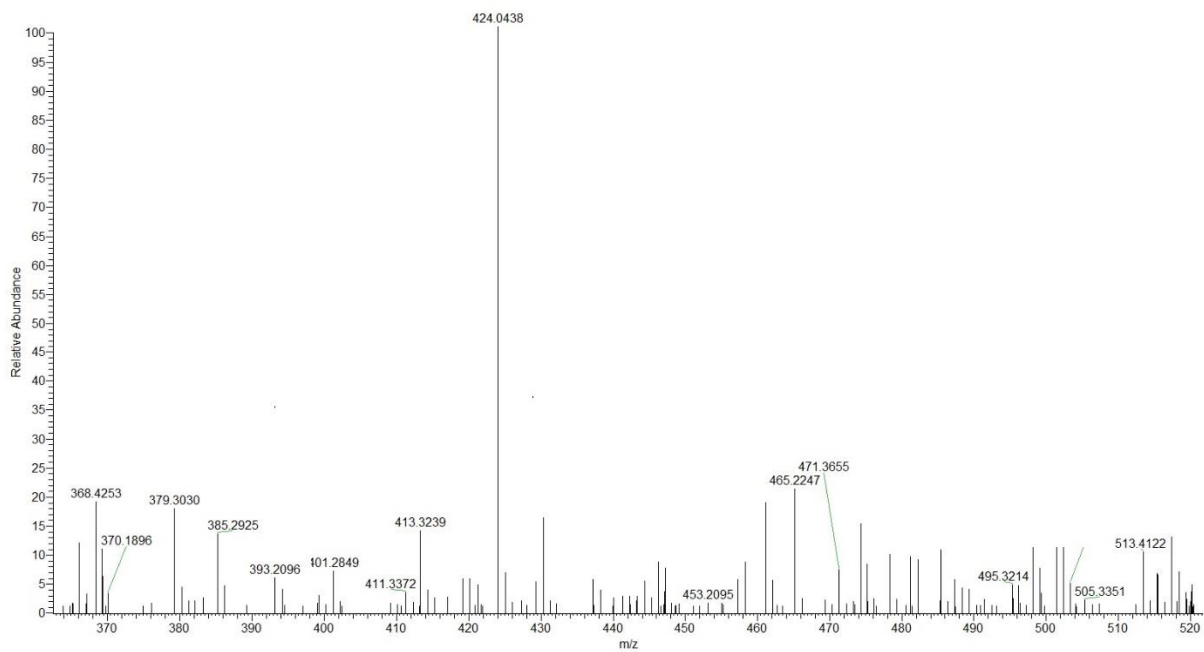

Figure S3. HRESIMS spectrum of compound 25

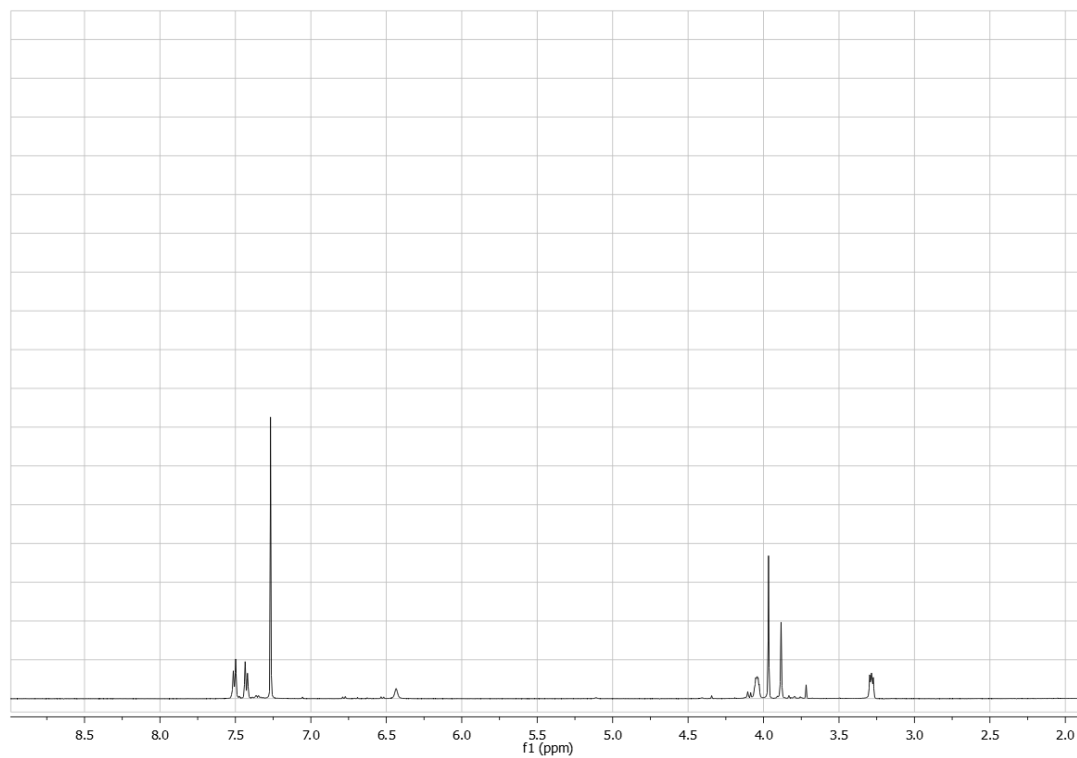

Figure S4. <sup>1</sup>H-NMR spectrum of compound 25 in CDCl<sub>3</sub>

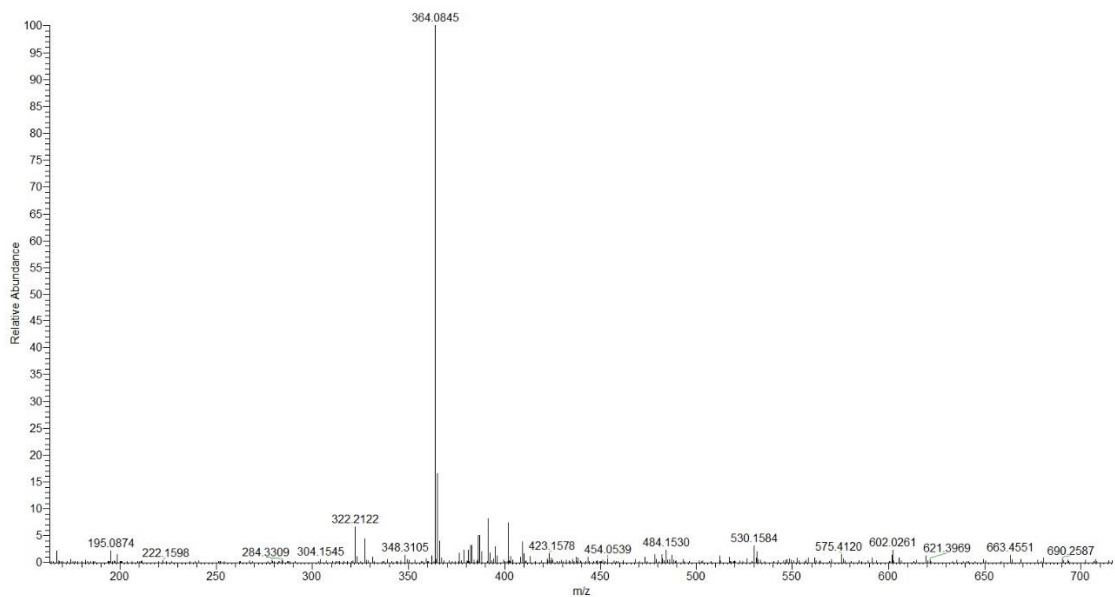

**Figure S5.** HRESIMS spectrum of compound **26**

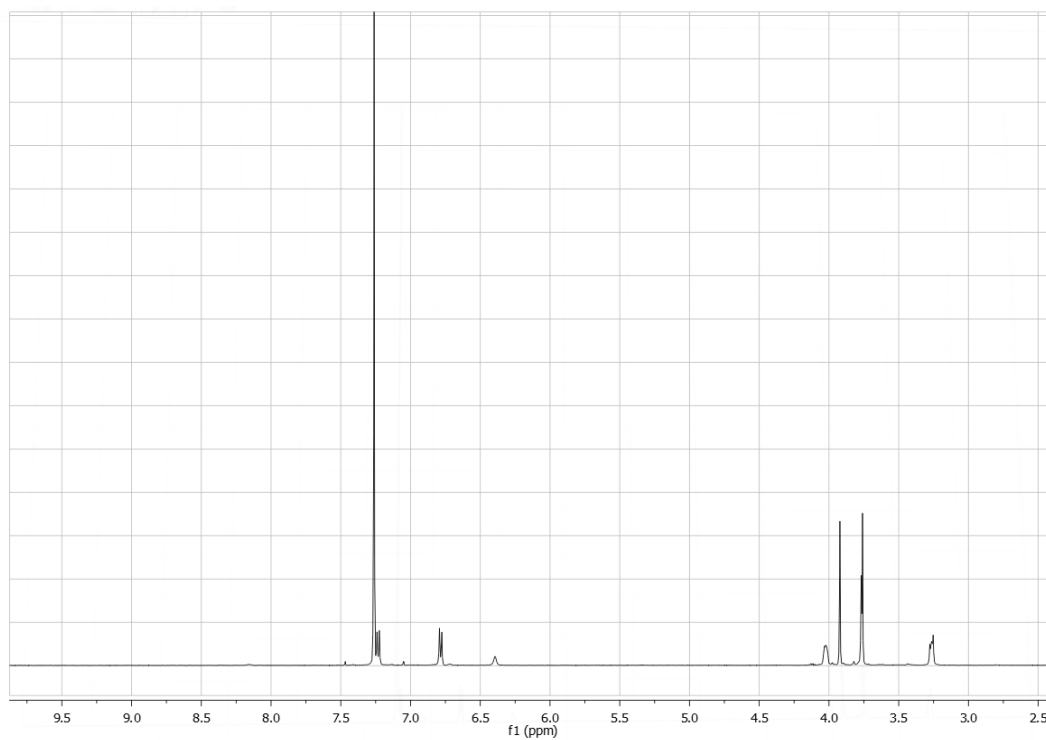

**Figure S6.** <sup>1</sup>H-NMR spectrum of compound **26** in CDCl<sub>3</sub>

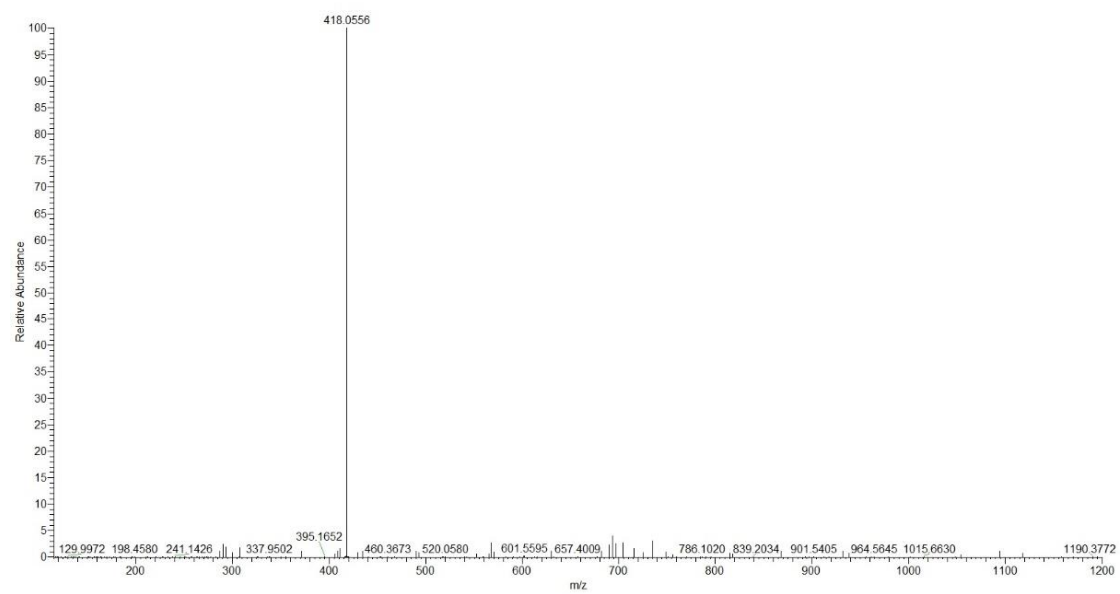

**Figure S7.** HRESIMS spectrum of compound **27**

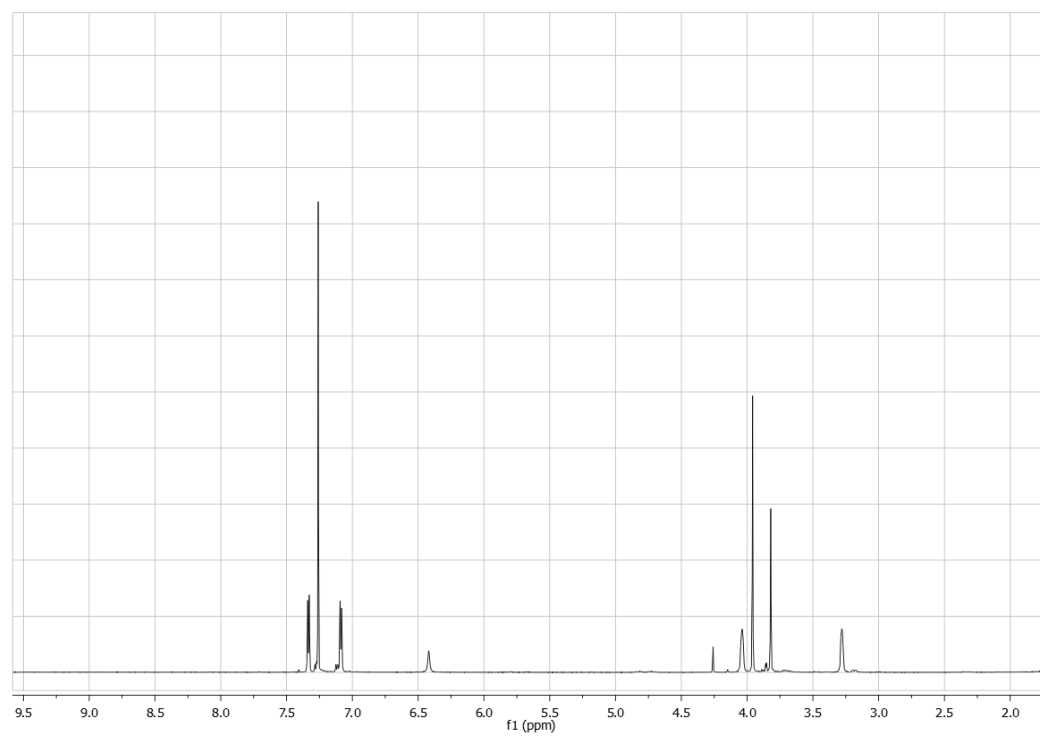

**Figure S8.** <sup>1</sup>H-NMR spectrum of compound **27** in CDCl<sub>3</sub>

**Table S1.** cLogD values of compounds **22** and **24-27**

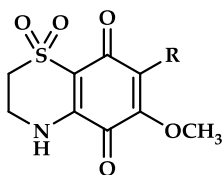

| Compound  | R                                                                          | cLogD <sup>a</sup> |
|-----------|----------------------------------------------------------------------------|--------------------|
| <b>22</b> | -CH <sub>2</sub> C <sub>6</sub> H <sub>5</sub>                             | 0.41               |
| <b>24</b> | -CH <sub>2</sub> C <sub>6</sub> H <sub>4</sub> - <i>p</i> Cl               | 1.01               |
| <b>25</b> | -CH <sub>2</sub> C <sub>6</sub> H <sub>4</sub> - <i>p</i> CF <sub>3</sub>  | 0.99               |
| <b>26</b> | -CH <sub>2</sub> C <sub>6</sub> H <sub>4</sub> - <i>p</i> OCH <sub>3</sub> | 0.33               |
| <b>27</b> | -CH <sub>2</sub> C <sub>6</sub> H <sub>4</sub> - <i>p</i> OCF <sub>3</sub> | 1.37               |

<sup>a</sup>cLogD calculated considering pH values: 7.4 and 7.2.
